# Supplementary material for: Somatic Embryogenesis and Agrobacterium-Mediated Gene Transfer Procedures in Chilean Temperate Japonica Rice Varieties for Precision Breeding
Source: MDPI journal article supplement (doi:10.3390/plants13030416), 2024-01-31
Supplement: s1 [file s1]

**Supplementary Table S1. Culture media for somatic embryogenesis in Chilean temperate japonica rice.**

| Medium   | Composition                                                                                                                                                                                                                                                                                                                                                                                                                                                                                                                                                             |
|----------|-------------------------------------------------------------------------------------------------------------------------------------------------------------------------------------------------------------------------------------------------------------------------------------------------------------------------------------------------------------------------------------------------------------------------------------------------------------------------------------------------------------------------------------------------------------------------|
| Base     | (NH <sub>4</sub> ) <sub>2</sub> SO <sub>4</sub> 463 mg/L, KNO <sub>3</sub> 2.83 g/L, KH <sub>2</sub> PO <sub>4</sub> 400 mg/L, MgSO <sub>4</sub> *7H <sub>2</sub> O 185 mg/L, CaCl <sub>2</sub> *2H <sub>2</sub> O 166 mg/L, H <sub>3</sub> BO <sub>3</sub> 1.6 mg/L, KI 0.83 mg/L, MnSO <sub>4</sub> *4H <sub>2</sub> O 4.4 mg/L, ZnSO <sub>4</sub> *7H <sub>2</sub> O 1.5 mg/L, Na <sub>2</sub> EDTA 37.3 mg/L, FeSO <sub>4</sub> *7H <sub>2</sub> O 27.8 mg/L, glycine 2.0 mg/L, thiamine-HCl 1.0 mg/L, pyridoxine-HCl 0.5 mg/L, nicotinic acid 0.5 mg/L, agar 7 g/L |
| 2N6      | Base Medium supplemented with myo-inositol 100 mg/L, L-proline 500 mg/L, 2,4-dichlorophenoxyacetic acid (2,4-D) 2.0 mg/L, casein hydrolysate 500 mg/L, sucrose 30 g/L, pH 5.8                                                                                                                                                                                                                                                                                                                                                                                           |
| N6R      | Base medium supplemented myo-inositol 100 mg/L, L-proline 500 mg/L, kinetin 0.5 mg/L, casein hydrolysate 1.0 mg/L, sorbitol 30 g/L, sucrose 20 g/L, activated charcoal 500 mg/L, pH 5.8                                                                                                                                                                                                                                                                                                                                                                                 |
| N6RN     | Base medium supplemented with myo-inositol 100 mg/L, L-proline 500 mg/L, kinetin 0.5 mg/L, 6-benzylaminopurine (BAP) 2.0 mg/L, indole-3-butyric acid (IBA) 1.5 mg/L, 2,4-D 1.5 mg/L, myo-inositol 100 mg/L, L-proline 500 mg/L, casein hydrolysate 1.0 mg/L, sorbitol 30 g/L, sucrose 20 g/L, activated charcoal 500 mg/L, pH 5.8                                                                                                                                                                                                                                       |
| N6F      | Base medium supplemented with casein hydrolysate 1.0 mg/L, sorbitol 30 g/L, sucrose 15 g/L, activated charcoal 500 mg/L, pH 5.8                                                                                                                                                                                                                                                                                                                                                                                                                                         |
| PIMII    | K <sub>2</sub> HPO <sub>4</sub> 3 g/L, NaH <sub>2</sub> PO <sub>4</sub> 1 g/L, NaCl 1 g/L, MgSO <sub>4</sub> *7H <sub>2</sub> O 0.3 g/L, KCl 0.15 g/L, CaCl <sub>2</sub> 10 mg/L, FeSO <sub>4</sub> *7H <sub>2</sub> O 2.5 mg/L, 2-(N-morpholino) ethanesulfonic acid 75 mM, glucose 1%, pH 5.7                                                                                                                                                                                                                                                                         |
| 2N6200cc | 2N6 supplemented with cefotaxime and carbenicillin 200 mg/L, each (MilliporeSigma)                                                                                                                                                                                                                                                                                                                                                                                                                                                                                      |
